# Supplementary material for: Design and Synthesis of Hybrid Compounds as Epigenetic Modifiers
Source: MDPI journal article supplement (doi:10.3390/ph14121308), 2021-12-15
Supplement: s1 [file s1]

[illegible]

|                         |      |      |      |      |      |      |      |      |           |           |
|-------------------------|------|------|------|------|------|------|------|------|-----------|-----------|
| Bioavailability Score   | 0.55 | 0.55 | 0.55 | 0.55 | 0.55 | 0.55 | 0.55 | 0.56 | 0.55      | 0.55      |
| PAINS alert             | 0    | 0    | 0    | 0    | 0    | 0    | 0    | 0    | 1 (nitro) | 1 (nitro) |
| Synthetic accessibility | 1.62 | 2.65 | 3.14 | 2.83 | 2.86 | 3.28 | 3.34 | 3.25 | 3.07      | 2.42      |

**Pharmacokinetics:** High and Low indicates gastrointestinal absorption; Yes and No indicates BBB (Blood Brain Barrier) permeation or P-gp (glycoprotein P). **Druglikeness:** Yes and No indicates that the molecule is according to all Lipinski, Ghose, Veber, Egan or Muegge descriptors. **Bioavailability Score:** Predict the probability of a compound to have at least 10% oral bioavailability in rat or measurable Caco-2 permeability.
